# Supplementary material for: Sphingosine 1-phosphate to p38 signaling via S1P1 receptor and Gαi/o evokes augmentation of capsaicin-induced ionic currents in mouse sensory neurons
Source: PubMed Central journal article supplement (PMC4280769; doi:10.1186/1744-8069-10-74), 2014-11-28

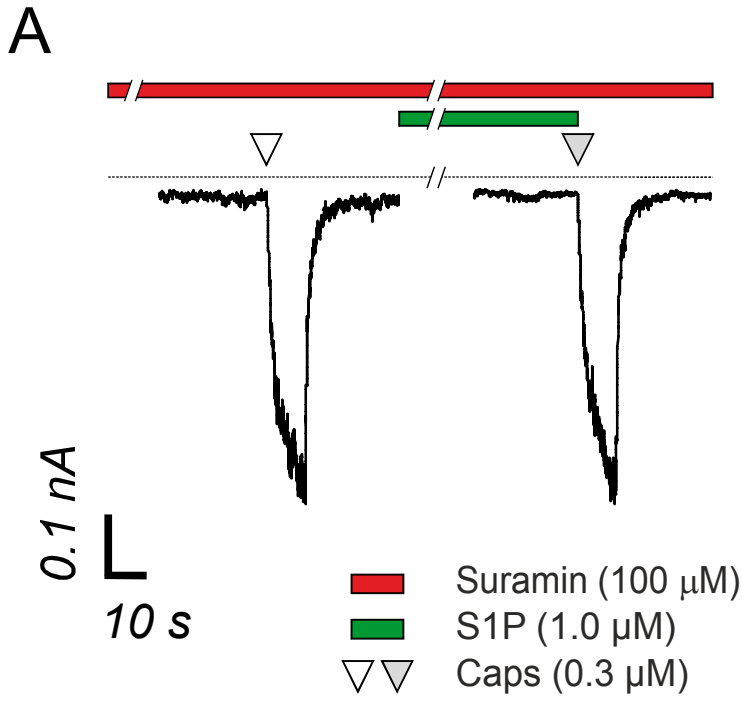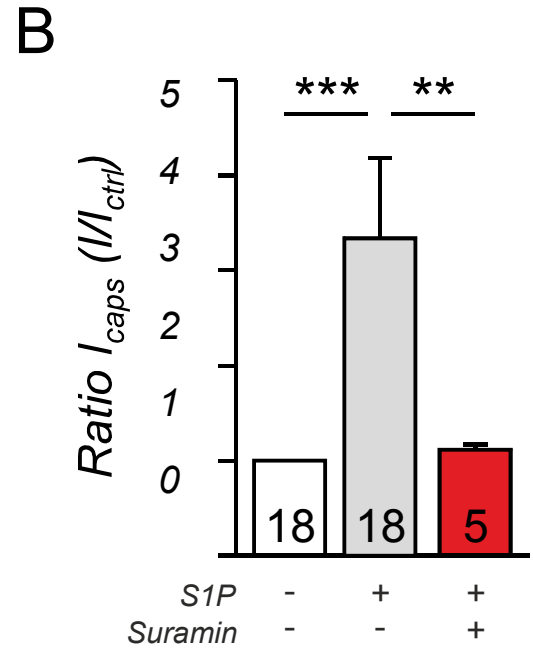

Supplement: 12990_2014_710_MOESM1_ESM.pdf [file 12990_2014_710_MOESM1_ESM.pdf]
